# Supplementary material for: RADIOMETRIC INSTRUMENTS MADE IN ZMA OSTROV N. OHRI.
Source: Royal Society of Chemistry journal article supplement (doi:10.1039/d2cp03996f), 1970-01-01

### Supplementary Information PCCP

Table S1 - Key geometry parameters obtained by optimizations at different level of theory for the Mo-oxo species. All distances in Å, all angles in °.

| <b>[(PY5Me2)MoO]<sup>+</sup></b> | BP86-D3(BJ)/def2-TZVP | B3LYP/SDD:6-31G(d) | M06-2X/def2-TZVP |
|----------------------------------|-----------------------|--------------------|------------------|
| Mo-O                             | 1.72                  | 1.73               | 1.69             |
| Mo-N1                            | 2.14                  | 2.19               | 2.19             |
| Mo-N2                            | 2.14                  | 2.19               | 2.19             |
| Mo-N3                            | 2.14                  | 2.19               | 2.19             |
| Mo-N4                            | 2.14                  | 2.19               | 2.19             |
| Mo-N5                            | 2.26                  | 2.25               | 2.22             |
| O-Mo-N1                          | 96.6                  | 96.4               | 96.8             |
| O-Mo-N2                          | 96.6                  | 96.4               | 96.8             |
| O-Mo-N3                          | 96.6                  | 96.4               | 96.8             |
| O-Mo-N4                          | 96.6                  | 96.4               | 96.8             |
| O-Mo-N5                          | 180.0                 | 180.0              | 180.0            |
| N5-Mo-N1                         | 83.4                  | 83.6               | 83.2             |
| N5-Mo-N2                         | 83.4                  | 83.6               | 83.2             |
| N5-Mo-N3                         | 83.4                  | 83.6               | 83.2             |
| N5-Mo-N4                         | 83.4                  | 83.6               | 83.2             |

| <b>[(PY5Me2)MoOH]<sup>+2</sup></b> | BP86-D3(BJ)/def2-TZVP | B3LYP/SDD:6-31G(d) | M06-2X/def2-TZVP |
|------------------------------------|-----------------------|--------------------|------------------|
| Mo-O                               | 1.89                  | 1.91               | 1.89             |
| O-H                                | 0.98                  | 0.97               | 0.96             |
| Mo-N1                              | 2.13                  | 2.18               | 2.18             |
| Mo-N2                              | 2.15                  | 2.20               | 2.19             |
| Mo-N3                              | 2.14                  | 2.19               | 2.18             |
| Mo-N4                              | 2.15                  | 2.20               | 2.19             |

|          |       |       |       |
|----------|-------|-------|-------|
| Mo-N5    | 2.21  | 2.23  | 2.23  |
| Mo-O-H   | 127.6 | 124.4 | 127.7 |
| O-Mo-N1  | 106.2 | 104.9 | 103.8 |
| O-Mo-N2  | 90.2  | 89.5  | 89.4  |
| O-Mo-N3  | 95.4  | 95.5  | 96.4  |
| O-Mo-N4  | 93.5  | 95.4  | 96.0  |
| O-Mo-N5  | 173.7 | 173.8 | 174.4 |
| N5-Mo-N1 | 79.6  | 80.2  | 80.2  |
| N5-Mo-N2 | 88.1  | 87.6  | 87.4  |
| N5-Mo-N3 | 78.7  | 79.4  | 79.6  |
| N5-Mo-N4 | 88.1  | 87.5  | 87.1  |

| <b>[(QY5Me2)MoO]<sup>+</sup></b> | BP86-D3(BJ)/def2-TZVP | B3LYP/SDD:6-31G(d) | M06-2X/def2-TZVP |
|----------------------------------|-----------------------|--------------------|------------------|
| Mo-O                             | 1.72                  | 1.73               | 1.74             |
| Mo-N1                            | 2.14                  | 2.18               | 2.19             |
| Mo-N2                            | 2.14                  | 2.18               | 2.19             |
| Mo-N3                            | 2.14                  | 2.18               | 2.19             |
| Mo-N4                            | 2.14                  | 2.18               | 2.19             |
| Mo-N5                            | 2.27                  | 2.27               | 2.32             |
| O-Mo-N1                          | 97.4                  | 96.4               | 96.2             |
| O-Mo-N2                          | 96.3                  | 96.4               | 96.2             |
| O-Mo-N3                          | 97.3                  | 96.4               | 96.2             |
| O-Mo-N4                          | 96.3                  | 96.5               | 96.2             |
| O-Mo-N5                          | 179.9                 | 179.9              | 180.0            |
| N5-Mo-N1                         | 82.7                  | 83.6               | 83.8             |
| N5-Mo-N2                         | 83.7                  | 83.6               | 83.8             |
| N5-Mo-N3                         | 82.6                  | 83.6               | 83.8             |
| N5-Mo-N4                         | 83.7                  | 83.6               | 83.8             |

| <b>[(QY5Me2)MoOH]<sup>+2</sup></b> | BP86-D3(BJ)/def2-TZVP | B3LYP/SDD:6-31G(d) | M06-2X/def2-TZVP |
|------------------------------------|-----------------------|--------------------|------------------|
| Mo-O                               | 1.90                  | 1.92               | 1.90             |
| O-H                                | 0.98                  | 0.97               | 0.96             |
| Mo-N1                              | 2.14                  | 2.18               | 2.18             |
| Mo-N2                              | 2.14                  | 2.20               | 2.19             |
| Mo-N3                              | 2.11                  | 2.17               | 2.17             |
| Mo-N4                              | 2.15                  | 2.20               | 2.20             |
| Mo-N5                              | 2.22                  | 2.24               | 2.23             |
| Mo-O-H                             | 125.2                 | 122.4              | 125.7            |
| O-Mo-N1                            | 95.6                  | 95.5               | 96.1             |
| O-Mo-N2                            | 92.7                  | 94.3               | 95.1             |
| O-Mo-N3                            | 108.4                 | 107.2              | 106.4            |
| O-Mo-N4                            | 89.6                  | 88.9               | 88.7             |
| O-Mo-N5                            | 172.9                 | 172.9              | 173.3            |
| N5-Mo-N1                           | 77.6                  | 78.2               | 78.4             |
| N5-Mo-N2                           | 88.8                  | 88.2               | 87.9             |
| N5-Mo-N3                           | 78.4                  | 79.0               | 79.1             |
| N5-Mo-N4                           | 88.9                  | 79.0               | 88.3             |

Table S2 - Protonation energies (kcal/mol) computed at different levels of theory as single-point calculation on geometries optimized at the BP86-D3(BJ)/def2-TZVP level of theory for the reaction:

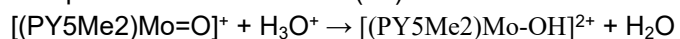

| DFT                                  | basis set  | vacuum | water  | $\Delta\Delta E_{\text{water/vacuum}}$ |
|--------------------------------------|------------|--------|--------|----------------------------------------|
| <b>DFT functional effect</b>         |            |        |        |                                        |
| BP86                                 | def2-TZVP  | -15.72 | -29.47 | -13.75                                 |
| BLYP                                 |            | -18.39 | -32.76 | -14.37                                 |
| B3LYP*                               |            | -24.82 | -38.48 | -13.66                                 |
| B3LYP                                |            | -28.67 | -41.80 | -13.13                                 |
| TPSS                                 |            | -18.93 | -32.48 | -13.55                                 |
| TPSSH                                |            | -23.93 | -36.95 | -13.02                                 |
| M06L                                 |            | -20.48 | -34.39 | -13.91                                 |
| <b>Basis set effect</b>              |            |        |        |                                        |
| BP86                                 | def2-SVP   | -8.84  | -22.05 | -13.21                                 |
|                                      | def2-TZVP  | -15.72 | -29.47 | -13.75                                 |
|                                      | def2-TZVPD | -18.11 | -31.31 | -13.20                                 |
|                                      | def2-QZVP  | -17.22 | -30.55 | -13.33                                 |
| <b>Dispersion corrections effect</b> |            |        |        |                                        |
| BP86                                 | def2-TZVP  | -15.72 | -29.47 | -13.75                                 |
| BP86-D3                              |            | -16.16 | -30.00 | -13.84                                 |
| BP86-D3(BJ)                          |            | -16.26 | -30.20 | -13.94                                 |

Table S3 - NBO charges computed in vacuum for the Mo-oxo species at the BP86-D3(BJ)/def2-TZVP level.

| Atom or group | [(PY5Me2) MoO] <sup>+</sup> | [(QY5Me2) MoO] <sup>+</sup> | $\Delta_{\text{charge}}$ | [(PY5Me2) MoOH] <sup>+2</sup> | [(QY5Me2) MoOH] <sup>+2</sup> | $\Delta_{\text{charge}}$ |
|---------------|-----------------------------|-----------------------------|--------------------------|-------------------------------|-------------------------------|--------------------------|
| Mo            | 1.11                        | 1.14                        | 0.03                     | 1.14                          | 1.14                          | 0.00                     |
| O             | -0.51                       | -0.51                       | 0.00                     | -0.77                         | -0.79                         | -0.02                    |
| H(OH)         |                             |                             |                          | 0.49                          | 0.48                          | -0.01                    |
| N1            | -0.41                       | -0.42                       | -0.01                    | -0.40                         | -0.40                         | 0.00                     |
| N2            | -0.41                       | -0.42                       | -0.01                    | -0.43                         | -0.43                         | 0.00                     |
| N3            | -0.41                       | -0.42                       | -0.01                    | -0.42                         | -0.41                         | 0.01                     |
| N4            | -0.41                       | -0.42                       | -0.01                    | -0.41                         | -0.43                         | -0.02                    |
| N5            | -0.49                       | -0.48                       | 0.01                     | -0.43                         | -0.43                         | 0.00                     |
| N1-ring       | 0.13                        | 0.12                        | -0.01                    | 0.28                          | 0.30                          | 0.02                     |
| N2-ring       | 0.13                        | 0.11                        | -0.02                    | 0.19                          | 0.19                          | 0.00                     |
| N3-ring       | 0.13                        | 0.12                        | -0.01                    | 0.28                          | 0.30                          | -0.02                    |
| N4-ring       | 0.13                        | 0.11                        | -0.02                    | 0.21                          | 0.21                          | 0.00                     |
| N5-ring       | -0.01                       | 0.02                        | 0.03                     | 0.26                          | 0.24                          | -0.02                    |
| C1-CH3        | -0.06                       | -0.05                       | 0.01                     | -0.04                         | -0.04                         | 0.00                     |
| C2-CH3        | -0.06                       | -0.05                       | 0.01                     | -0.04                         | -0.04                         | 0.00                     |

Table S4 - NBO charges computed in vacuum for the Mo-sulphide species at the BP86-D3(BJ)/def2-TZVP level.

| Atom or group | [(PY5Me2) MoS <sub>2</sub> ] <sup>+</sup> | [(QY5Me2) MoS <sub>2</sub> ] <sup>+</sup> | $\Delta_{\text{charge}}$ | [(PY5Me2) MoSSH] <sup>+2</sup> | [(QY5Me2) MoSSH] <sup>+2</sup> | $\Delta_{\text{charge}}$ |
|---------------|-------------------------------------------|-------------------------------------------|--------------------------|--------------------------------|--------------------------------|--------------------------|
| Mo            | 0.43                                      | 0.44                                      | 0.01                     | 0.47                           | 0.48                           | 0.01                     |
| S1            | -0.07                                     | -0.06                                     | 0.01                     | 0.22                           | 0.21                           | -0.01                    |
| S2            | -0.02                                     | -0.05                                     | -0.03                    | 0.00                           | -0.03                          | -0.03                    |
| H(SH)         |                                           |                                           |                          | 0.13                           | 0.12                           | -0.01                    |
| N1            | -0.38                                     | -0.39                                     | -0.01                    | -0.39                          | -0.40                          | -0.01                    |
| N2            | -0.40                                     | -0.40                                     | 0.00                     | -0.41                          | -0.42                          | -0.01                    |
| N3            | -0.38                                     | -0.39                                     | -0.01                    | -0.39                          | -0.39                          | 0.00                     |
| N4            | -0.39                                     | -0.40                                     | -0.01                    | -0.40                          | -0.41                          | -0.01                    |
| N5            | -0.40                                     | -0.40                                     | 0.00                     | -0.39                          | -0.39                          | 0.00                     |
| N1-ring       | 0.23                                      | 0.22                                      | 0.01                     | 0.30                           | 0.31                           | 0.01                     |
| N2-ring       | 0.12                                      | 0.12                                      | 0.00                     | 0.17                           | 0.18                           | 0.01                     |
| N3-ring       | 0.20                                      | 0.23                                      | 0.03                     | 0.28                           | 0.29                           | 0.01                     |
| N4-ring       | 0.15                                      | 0.12                                      | -0.03                    | 0.24                           | 0.26                           | 0.02                     |

|         |       |       |       |       |       |       |
|---------|-------|-------|-------|-------|-------|-------|
| N5-ring | 0.07  | 0.08  | 0.01  | 0.27  | 0.25  | -0.02 |
| C1-CH3  | -0.06 | -0.09 | -0.03 | -0.04 | -0.07 | -0.03 |
| C2-CH3  | -0.06 | -0.05 | 0.01  | -0.04 | -0.04 | 0.00  |

Table S5 - Solvation energy (kcal/mol) and total non-electrostatic contribution computed as single point calculations on the BP86-D3(BJ)/def2-TZVP optimized geometries.

|                              | BP86-D3(BJ)/def2-TZVP<br>(SMD wat) | B3LYP-D3(BJ)/def2-TZVP<br>(SMD wat) | M06-2X-D3(BJ)/def2-TZVP<br>(SMD wat) |
|------------------------------|------------------------------------|-------------------------------------|--------------------------------------|
| [(PY5Me2)MoO] <sup>+</sup>   | -40.40                             | -42.51                              | -45.89                               |
| [(PY5Me2)MoOH] <sup>+2</sup> | -135.01                            | -135.94                             | -135.77                              |
| [(QY5Me2)MoO] <sup>+</sup>   | -39.78                             | -41.83                              | -46.05                               |
| [(QY5Me2)MoOH] <sup>+2</sup> | -122.94                            | -124.15                             | -124.97                              |

Table S6 - Average Mo–X distances during MD simulations along with the standard deviation, compared to the QM-optimized distances in the implicit solvent (BP86-D3(BJ)/def2-TZVP; C-PCM, solvent=water).

|       | PyO  |            |            | PyOH |            |            |
|-------|------|------------|------------|------|------------|------------|
|       | QM   | MM         |            | QM   | MM         |            |
|       |      | mean value | stand. dev |      | mean value | stand. dev |
| Mo-O  | 1.73 | 1.73       | 0.03       | 1.89 | 1.89       | 0.04       |
| Mo-N1 | 2.14 | 2.16       | 0.03       | 2.13 | 2.13       | 0.05       |
| Mo-N2 | 2.14 | 2.16       | 0.03       | 2.14 | 2.16       | 0.05       |
| Mo-N3 | 2.14 | 2.16       | 0.03       | 2.13 | 2.13       | 0.05       |
| Mo-N4 | 2.14 | 2.16       | 0.03       | 2.14 | 2.15       | 0.05       |
| Mo-N5 | 2.25 | 2.23       | 0.03       | 2.21 | 2.14       | 0.04       |

|       | QyO  |            |            | QyOH |            |            |
|-------|------|------------|------------|------|------------|------------|
|       | QM   | MM         |            | QM   | MM         |            |
|       |      | mean value | stand. dev |      | mean value | stand. dev |
| Mo-O  | 1.73 | 1.73       | 0.03       | 1.90 | 1.89       | 0.04       |
| Mo-N1 | 2.14 | 2.07       | 0.05       | 2.14 | 2.16       | 0.04       |

|       |      |      |      |      |      |      |
|-------|------|------|------|------|------|------|
| Mo-N2 | 2.14 | 2.08 | 0.05 | 2.11 | 2.14 | 0.04 |
| Mo-N3 | 2.14 | 2.05 | 0.05 | 2.15 | 2.16 | 0.05 |
| Mo-N4 | 2.14 | 2.05 | 0.05 | 2.13 | 2.14 | 0.05 |
| Mo-N5 | 2.28 | 1.92 | 0.05 | 2.22 | 2.11 | 0.05 |

Figure S1 - Graphic reporting the radial distribution function of the water hydrogen atoms around the oxo  $\alpha$ -ligand of Mo derived from MD simulations.

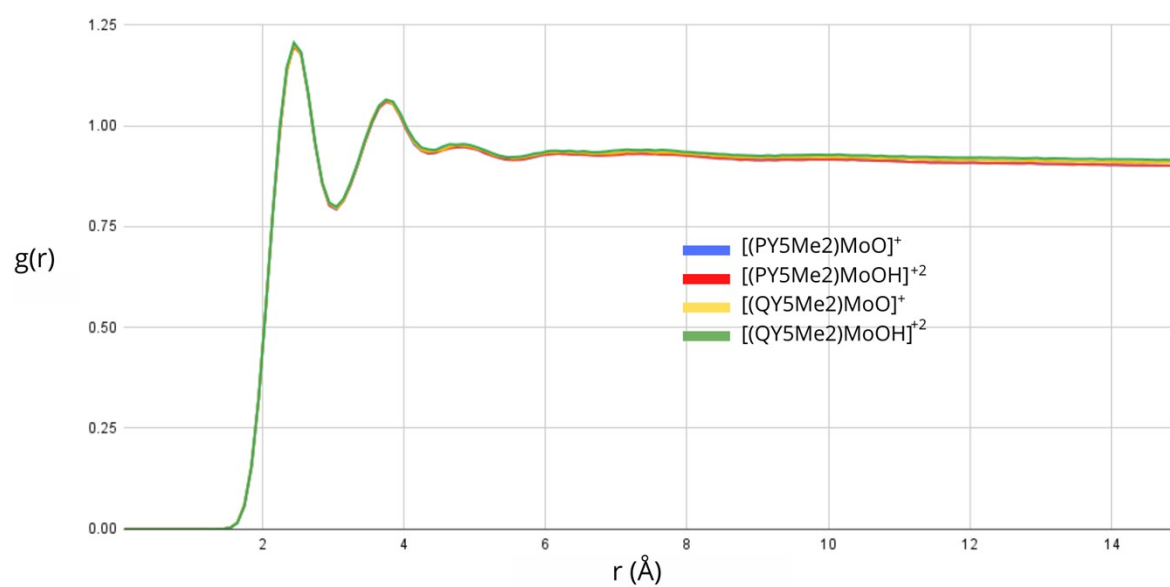

Supplement: d2cp03996f1.pdf [file d2cp03996f1.pdf]
